# Supplementary material for: A global microbiome survey of vineyard soils highlights the microbial dimension of viticultural terroirs
Source: PubMed Central journal article supplement (PMC8933554; doi:10.1038/s42003-022-03202-5), 2022-03-18
Supplement: 42003_2022_3202_MOESM1_ESM.pdf [file 42003_2022_3202_MOESM1_ESM.pdf]

**A global microbiome survey of vineyard soils highlights the microbial dimension of viticultural *terroirs***

**Alex Gobbi<sup>1</sup>, Alberto Acedo<sup>2</sup>, Nabeel Imam<sup>2</sup>, Rui .G. Santini<sup>3</sup>, Rüdiger Ortiz-Álvarez<sup>2</sup>,  
Lea Ellegaard-Jensen<sup>4</sup>, Ignacio Belda<sup>2,5\*¥</sup> Lars .H. Hansen<sup>1¥</sup>**

<sup>1</sup> Department of Plant and Environmental Science, University of Copenhagen, Denmark

<sup>2</sup> Biome Makers Inc., 95605-West Sacramento, CA, USA

<sup>3</sup> Natural History Museum, Centre for GeoGenetics, University of Copenhagen, Copenhagen, Denmark

<sup>4</sup> Department of Environmental Science, Aarhus University, Roskilde, Denmark

<sup>5</sup> Department of Genetics, Physiology and Microbiology. Complutense University of Madrid, 28040-Madrid, Spain

¥ IB and LHH supervised the project equally

\* corresponding author

**Supplementary Information**

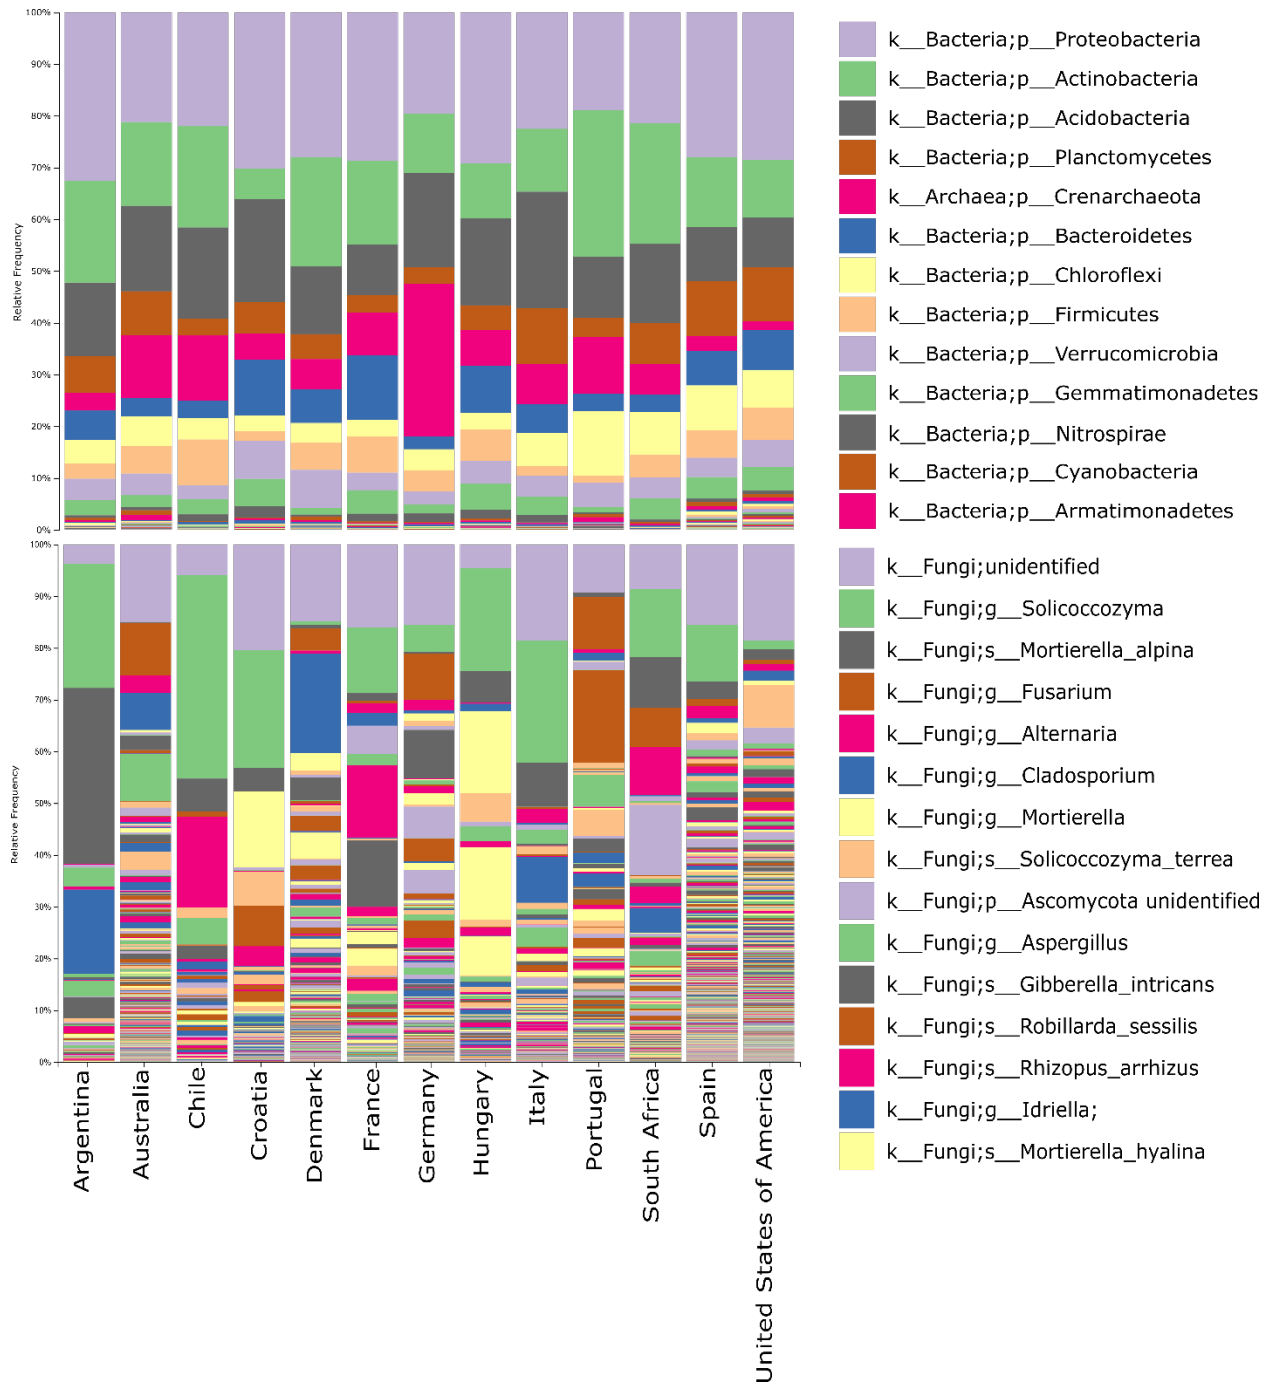

Figure S1. Taxonomical composition at country level: above) a phyla-level taxa bar plot representing the samples' 16S community, grouped by country; the colours identify the 13 most represented phyla. Below) a taxa bar plot representing the fungal community at the highest rank for the 15 most represented taxa in the samples, grouped by country.

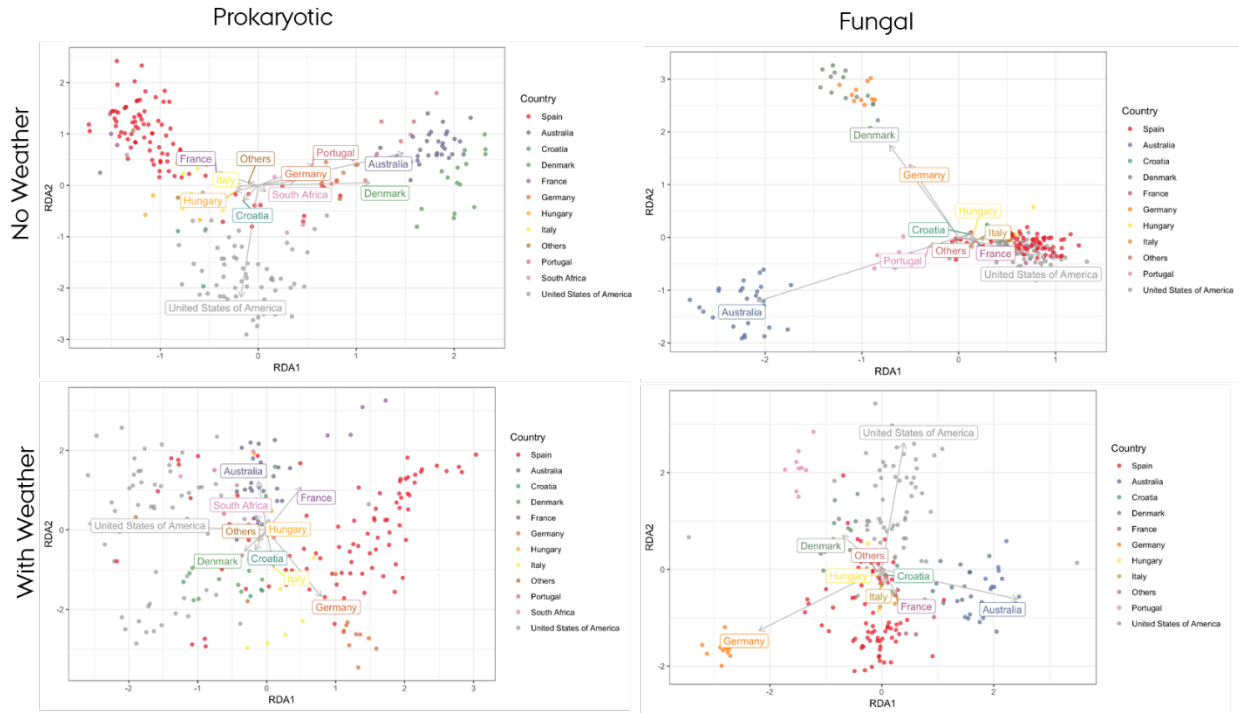

Figure S2. Variance partitioning RDA on the prokaryotic and fungal community with and without weather conditions. Samples are coloured based on the countries they come from.

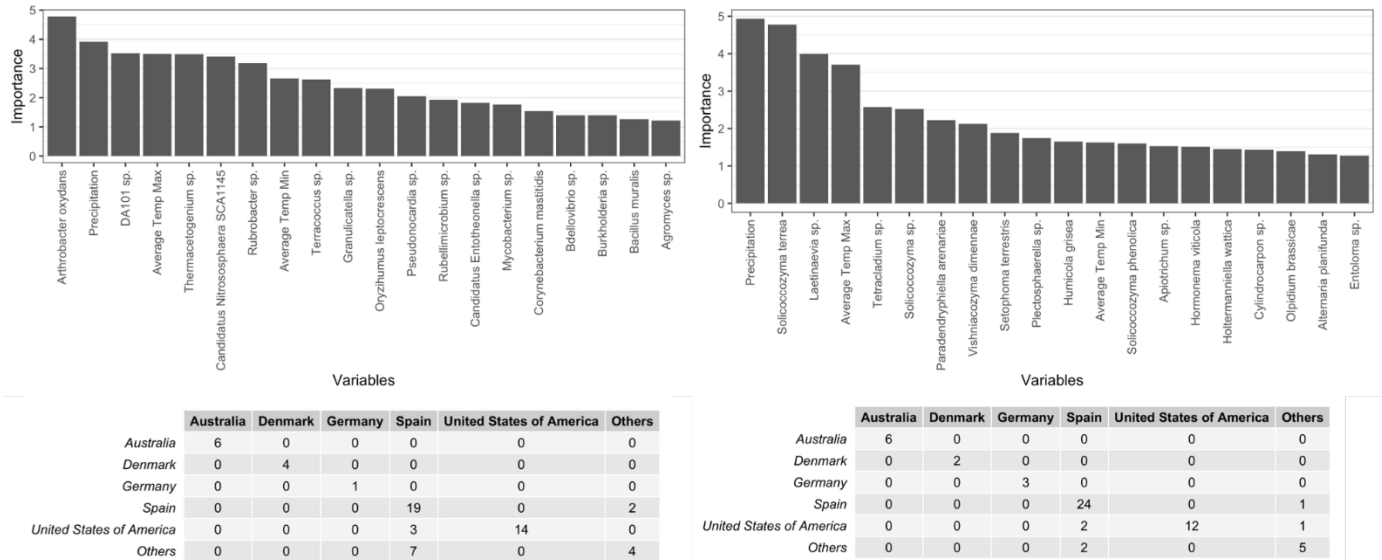

Figure S3. Random forest results at national scale including microbial and meteorological data. The top charts show the confusion matrixes for the prokaryotic and fungal communities; the bottom charts give the 20 best predictor for prokaryotic (right) and fungal (left) community.

**Supplementary Tables 1: Primers used in this study for 16S and ITS**

| Sequence 5'-3'         | Name    | Region | Amplicon | Study | Reference              |
|------------------------|---------|--------|----------|-------|------------------------|
| GTGYCAGCMGCCGCGGTAA    | 515F    | V4     | 16S      | MW    | (Caporaso et al. 2011) |
| GGACTACNVGGGTWTCTAAT   | 806R    | V4     | 16S      | MW    | (Caporaso et al. 2011) |
| Available upon request | /       | V4     | 16S      | BM    | Patent WO2017096385    |
| Available upon request | /       | V4     | 16S      | BM    | Patent WO2017096385    |
| Available upon request | /       | ITS1   | ITS      | BM    | Patent WO2017096385    |
| Available upon request | /       | ITS1   | ITS      | BM    | Patent WO2017096385    |
| GAACCGGCGGARGGATCA     | ITS1IF2 | ITS1   | ITS      | MW    | (Gaylarde et al. 2017) |
| GCTGCGTTCTTCATCGATGC   | ITS2    | ITS1   | ITS      | MW    | (Gaylarde et al. 2017) |

**Supplementary Tables 2: Random Forest Model Accuracy for each Test-Dataset according to the confusion Matrix**

| Test | Type | Level     | Weather Conditions | Test_set_accuracy | Test_Set_Accuracy_% |
|------|------|-----------|--------------------|-------------------|---------------------|
| 1    | 16s  | Country   | yes                | 0.8               | 80                  |
| 2    | 16s  | Country   | no                 | 0.8333333333      | 83.3333333          |
| 3    | 16s  | Continent | yes                | 0.916666667       | 91.6666667          |
| 4    | 16s  | Continent | no                 | 0.9333333333      | 93.3333333          |
| 5    | its  | Country   | yes                | 0.896551724       | 89.6551724          |
| 6    | its  | Country   | no                 | 0.862068966       | 86.2068966          |
| 7    | its  | Continent | yes                | 0.913793103       | 91.3793103          |
| 8    | its  | Continent | no                 | 0.913793103       | 91.3793103          |
