# Supplementary material for: A global microbiome survey of vineyard soils highlights the microbial dimension of viticultural terroirs
Source: PubMed Central journal article supplement (PMC8933554; doi:10.1038/s42003-022-03202-5), 2022-03-18
Supplement: 42003_2022_3202_MOESM2_ESM.pdf [file 42003_2022_3202_MOESM2_ESM.pdf]

## Description of Additional Supplementary Files

**File name:** Supplementary Data 1

**Description:** sample name deposited on Sequence Read Archive and corresponding environmental data used in this study

**File name:** Supplementary Data 2

**Description:** Raw data and correlations between: Long-Term Climate, Weather close to Harvest and Alpha-Diversity

**File name:** Supplementary Data 3

**Description:** Explained variance PCA Plots for 16S and ITS at continental, national and regional scale distribution; The variance explained by both axes is measured in the R2 column while the PERMANOVA score is reported in the column Pr(>F).

**File name:** Supplementary Data 4

**Description:** List of Best-Predictors for the Random Forest Model that were determined by the model and used to assign the samples to their country based on microbial composition, with and without weather conditions

**File name:** Supplementary Data 5

**Description:** Confusion Matrix from Random Forest Model on Test-Dataset; numbers in each cells represent the calls of the model for each iteration

**File name:** Supplementary Data 6

**Description:** Complete list of the genera for the prokaryotic and fungal community that constitutes the core-microbiome at Continental-level based on our dataset.

**File name:** Supplementary Data 7

**Description:** PERMANOVA Results based on Unweighted Unifrac Distance repeated for each gene-marker, scale and with/without weather conditions
