# Supplementary material for: A global microbiome survey of vineyard soils highlights the microbial dimension of viticultural terroirs
Source: Commun Biol. 2022 Mar 18;5:241. doi: 10.1038/s42003-022-03202-5 (PMC8933554; doi:10.1038/s42003-022-03202-5)
Supplement: Supplementary file 10 — Reporting Summary [file 42003_2022_3202_MOESM10_ESM.pdf]

## Reporting Summary

Nature Research wishes to improve the reproducibility of the work that we publish. This form provides structure for consistency and transparency in reporting. For further information on Nature Research policies, see our [Editorial Policies](#) and the [Editorial Policy Checklist](#).

### Statistics

For all statistical analyses, confirm that the following items are present in the figure legend, table legend, main text, or Methods section.

n/a Confirmed

- |                                     |                                     |                                                                                                                                                                                                                                                            |
|-------------------------------------|-------------------------------------|------------------------------------------------------------------------------------------------------------------------------------------------------------------------------------------------------------------------------------------------------------|
| <input type="checkbox"/>            | <input checked="" type="checkbox"/> | The exact sample size ( $n$ ) for each experimental group/condition, given as a discrete number and unit of measurement                                                                                                                                    |
| <input type="checkbox"/>            | <input checked="" type="checkbox"/> | A statement on whether measurements were taken from distinct samples or whether the same sample was measured repeatedly                                                                                                                                    |
| <input type="checkbox"/>            | <input checked="" type="checkbox"/> | The statistical test(s) used AND whether they are one- or two-sided<br><i>Only common tests should be described solely by name; describe more complex techniques in the Methods section.</i>                                                               |
| <input type="checkbox"/>            | <input checked="" type="checkbox"/> | A description of all covariates tested                                                                                                                                                                                                                     |
| <input type="checkbox"/>            | <input checked="" type="checkbox"/> | A description of any assumptions or corrections, such as tests of normality and adjustment for multiple comparisons                                                                                                                                        |
| <input type="checkbox"/>            | <input checked="" type="checkbox"/> | A full description of the statistical parameters including central tendency (e.g. means) or other basic estimates (e.g. regression coefficient) AND variation (e.g. standard deviation) or associated estimates of uncertainty (e.g. confidence intervals) |
| <input type="checkbox"/>            | <input checked="" type="checkbox"/> | For null hypothesis testing, the test statistic (e.g. $F$ , $t$ , $r$ ) with confidence intervals, effect sizes, degrees of freedom and $P$ value noted<br><i>Give <math>P</math> values as exact values whenever suitable.</i>                            |
| <input checked="" type="checkbox"/> | <input type="checkbox"/>            | For Bayesian analysis, information on the choice of priors and Markov chain Monte Carlo settings                                                                                                                                                           |
| <input checked="" type="checkbox"/> | <input type="checkbox"/>            | For hierarchical and complex designs, identification of the appropriate level for tests and full reporting of outcomes                                                                                                                                     |
| <input checked="" type="checkbox"/> | <input type="checkbox"/>            | Estimates of effect sizes (e.g. Cohen's $d$ , Pearson's $r$ ), indicating how they were calculated                                                                                                                                                         |

*Our web collection on [statistics for biologists](#) contains articles on many of the points above.*

### Software and code

Policy information about [availability of computer code](#)

Data collection

No original or unpublished software was used for data-collection. Weather information was retrieved from World Weather Archive (<https://www.worldweatheronline.com/>), and long-term climatic data was retrieved from World Climate Archive (<http://www.worldclimate.com/>) with the closest reference point chosen based on the GIS coordinates identifying the samples.

Data analysis

All the data collected in this study were analyzed using Qiime2 v2019.7 and R-Core-Team-2019

For manuscripts utilizing custom algorithms or software that are central to the research but not yet described in published literature, software must be made available to editors and reviewers. We strongly encourage code deposition in a community repository (e.g. GitHub). See the Nature Research [guidelines for submitting code & software](#) for further information.

### Data

Policy information about [availability of data](#)

All manuscripts must include a [data availability statement](#). This statement should provide the following information, where applicable:

- Accession codes, unique identifiers, or web links for publicly available datasets
- A list of figures that have associated raw data
- A description of any restrictions on data availability

The data are publicly available via European Nucleotide Archive (ENA) under the following study accession number: PRJEB40350

## Field-specific reporting

Please select the one below that is the best fit for your research. If you are not sure, read the appropriate sections before making your selection.

☐ Life sciences ☐ Behavioural & social sciences ☒ Ecological, evolutionary & environmental sciences

For a reference copy of the document with all sections, see [nature.com/documents/nr-reporting-summary-flat.pdf](https://www.nature.com/documents/nr-reporting-summary-flat.pdf)

## Ecological, evolutionary & environmental sciences study design

All studies must disclose on these points even when the disclosure is negative.

|                                   |                                                                                                                                                                                                                                                                                                                                                                                                                                                                                                                                                                                            |
|-----------------------------------|--------------------------------------------------------------------------------------------------------------------------------------------------------------------------------------------------------------------------------------------------------------------------------------------------------------------------------------------------------------------------------------------------------------------------------------------------------------------------------------------------------------------------------------------------------------------------------------------|
| Study description                 | We sampled 252 soil-samples from 200 vineyards. We built 504 amplicon libraries equally distributed between 16S and ITS and subsequently analyzed them to retrieve information about the microbial community harboured in the vineyard's soil. We developed a model based on random forest to trace-back a soil sample to its country of origin only based on its microbial composition.                                                                                                                                                                                                   |
| Research sample                   | The research samples used in this research were soil samples taken from the top-surface 0-5cm in vineyards from 13 different countries worldwide. The choice of soil is due to the fact that it has been shown to be the main reservoir of microbes colonizing grapevine plants. The choice of the depth is due to the fact that top-soil harbor the highest microbial biomass and diversity. Finally the 13 countries represented in this study account for the biggest wine-producers worldwide                                                                                          |
| Sampling strategy                 | Existing studies in literature describe analogous way of collecting samples to represent microbial population within a field. In this studies two different dataset were produced. In one dataset (BM) three samples were taken randomly within each field and subsequently pooled together before the analyses. In the other dataset (MW) 5 samples were taken in the field following a diagonal-scheme pattern. Samples for both dataset are taken from top-soil (0-5 cm) and collected within two weeks from the grape-harvest to have consistent climatic conditions between countries |
| Data collection                   | Samples were taken and processed by AG and AA during three years from 2015 to 2018. The whole data-analyses started in 2018                                                                                                                                                                                                                                                                                                                                                                                                                                                                |
| Timing and spatial scale          | The samples collection was planned and performed accordingly to harvest-time in the 13 different countries across the different years of sampling. The countries were chosen due to their importance in the wine-production                                                                                                                                                                                                                                                                                                                                                                |
| Data exclusions                   | spurious samples that was lacking either the bacterial or the fungal representation were excluded from the analyses. This was done in order to allow future interaction-studies using the same dataset. Also, samples that contained less than 10000 reads for each genetic marker were excluded from the analyses.                                                                                                                                                                                                                                                                        |
| Reproducibility                   | All the attempts to repeat the experiment were successful. DNA extraction methods, library preparation protocols and subsequent sequencing are successfully applied on all the samples included and excluded from this research                                                                                                                                                                                                                                                                                                                                                            |
| Randomization                     | The samples were collected by different people, processed during three years from different people in different laboratories and finally sequenced on different sequencing runs and different sequencer.                                                                                                                                                                                                                                                                                                                                                                                   |
| Blinding                          | N/A                                                                                                                                                                                                                                                                                                                                                                                                                                                                                                                                                                                        |
| Did the study involve field work? | <input checked="" type="checkbox"/> Yes <input type="checkbox"/> No                                                                                                                                                                                                                                                                                                                                                                                                                                                                                                                        |

## Field work, collection and transport

|                        |                                                                                                                                                                    |
|------------------------|--------------------------------------------------------------------------------------------------------------------------------------------------------------------|
| Field conditions       | The samples were collected from the different fields worldwide following the grapevine-vegetative cycle and consistently sampled within 2 weeks from grape-harvest |
| Location               | Samples were taken from vineyards in California, Spain, Italy, France, Germany, Denmark, Portugal, Australia, Oregon, Texas, Argentina, Chile, Croatia and Hungary |
| Access & import/export | Samples were collected upon agreement with the owner of the land and exported in compliance of actual laws                                                         |
| Disturbance            | no disturbance were caused by this study                                                                                                                           |

## Reporting for specific materials, systems and methods

We require information from authors about some types of materials, experimental systems and methods used in many studies. Here, indicate whether each material, system or method listed is relevant to your study. If you are not sure if a list item applies to your research, read the appropriate section before selecting a response.

Materials & experimental systems

|                                     |                                                        |
|-------------------------------------|--------------------------------------------------------|
| n/a                                 | Involvement in the study                               |
| <input checked="" type="checkbox"/> | <input type="checkbox"/> Antibodies                    |
| <input checked="" type="checkbox"/> | <input type="checkbox"/> Eukaryotic cell lines         |
| <input checked="" type="checkbox"/> | <input type="checkbox"/> Palaeontology and archaeology |
| <input checked="" type="checkbox"/> | <input type="checkbox"/> Animals and other organisms   |
| <input checked="" type="checkbox"/> | <input type="checkbox"/> Human research participants   |
| <input checked="" type="checkbox"/> | <input type="checkbox"/> Clinical data                 |
| <input checked="" type="checkbox"/> | <input type="checkbox"/> Dual use research of concern  |

Methods

|                                     |                                                 |
|-------------------------------------|-------------------------------------------------|
| n/a                                 | Involvement in the study                        |
| <input checked="" type="checkbox"/> | <input type="checkbox"/> ChIP-seq               |
| <input checked="" type="checkbox"/> | <input type="checkbox"/> Flow cytometry         |
| <input checked="" type="checkbox"/> | <input type="checkbox"/> MRI-based neuroimaging |
